# Supplementary material for: SLE Plasma Profiling Identifies Unique Signatures of Lupus Nephritis and Discoid Lupus
Source: PubMed Central journal article supplement (PMC6783423; doi:10.1038/s41598-019-50231-y), 2019-10-08
Supplement: 41598_2019_50231_MOESM1_ESM.pdf [file 41598_2019_50231_MOESM1_ESM.pdf]

# **SLE Plasma Profiling Identifies Unique Signatures of Lupus Nephritis and Discoid Lupus**

Michael A. Smith, Jill Henault, Jodi L. Karnell, Melissa L. Parker, Jeffrey M. Riggs, Dominic Sinibaldi, Devon K. Taylor, Rachel Ettinger, Ethan P. Grant, Miguel A. Sanjuan, Roland Kolbeck, Michelle A. Petri, Kerry A. Casey.

## **Supplementary Tables**

**Supplemental Table 1.** Analytes associated with proliferative nephritis

| Variable             | Comparison                      | AUC (95% CI)      | N      | Mann–Whitney   |          |
|----------------------|---------------------------------|-------------------|--------|----------------|----------|
|                      |                                 |                   |        | <i>P</i> value | FDR      |
| Anti-dsDNA IgG       | LN III, IV vs LN V              | 0.83 (0.72, 0.92) | 40, 22 | < 0.001        | 1.98E-03 |
| Anti-ssDNA IgG       | LN III, IV vs LN V              | 0.81 (0.70, 0.91) | 40, 22 | < 0.001        | 3.50E-03 |
| Anti-chromatin IgG   | LN III, IV vs LN V              | 0.81 (0.69, 0.91) | 40, 22 | < 0.001        | 3.68E-03 |
| Anti-nucleosome IgG  | LN III, IV vs LN V              | 0.80 (0.68, 0.91) | 40, 22 | < 0.001        | 4.46E-03 |
| Anti-dsRNA IgG       | LN III, IV vs LN V              | 0.76 (0.63, 0.87) | 40, 22 | < 0.001        | 1.69E-02 |
| Anti-histone H1 IgG  | LN III, IV vs LN V              | 0.76 (0.63, 0.88) | 40, 22 | < 0.001        | 1.79E-02 |
| Anti-histone H2B IgG | LN III, IV vs LN V              | 0.74 (0.61, 0.85) | 40, 22 | 0.001          | 2.55E-02 |
| Anti-histone H2A IgG | LN III, IV vs LN V              | 0.74 (0.60, 0.85) | 40, 22 | 0.002          | 3.14E-02 |
| Anti-nucleosome IgA  | LN III, IV vs LN V              | 0.73 (0.59, 0.85) | 40, 22 | 0.003          | 4.04E-02 |
| Anti-chromatin IgM   | LN III, IV vs LN V              | 0.72 (0.58, 0.84) | 40, 22 | 0.004          | 5.07E-02 |
| Anti-dsDNA IgE       | LN III, IV vs LN V              | 0.64 (0.49, 0.77) | 40, 22 | 0.07           | 2.9E-01  |
| Anti-dsDNA IgG       | LN III, IV vs no renal symptoms | 0.76 (0.65, 0.86) | 40, 22 | < 0.001        | 5.17E-04 |
| Anti-ssDNA IgG       | LN III, IV vs no renal symptoms | 0.71 (0.60, 0.80) | 40, 22 | < 0.001        | 6.57E-03 |
| Anti-chromatin IgG   | LN III, IV vs no renal symptoms | 0.76 (0.65, 0.86) | 40, 22 | < 0.001        | 5.17E-04 |
| Anti-nucleosome IgG  | LN III, IV vs no renal symptoms | 0.75 (0.63, 0.85) | 40, 22 | < 0.001        | 8.57E-04 |
| Anti-dsRNA IgG       | LN III, IV vs no renal symptoms | 0.71 (0.60, 0.81) | 40, 22 | < 0.001        | 6.80E-03 |
| Anti-histone H1 IgG  | LN III, IV vs no renal symptoms | 0.70 (0.59, 0.80) | 40, 22 | < 0.001        | 1.01E-02 |
| Anti-histone H2B IgG | LN III, IV vs no renal symptoms | 0.71 (0.60, 0.81) | 40, 22 | < 0.001        | 6.58E-03 |
| Anti-histone H2A IgG | LN III, IV vs no renal symptoms | 0.68 (0.57, 0.78) | 40, 22 | 0.001          | 1.92E-02 |
| Anti-nucleosome IgA  | LN III, IV vs no renal symptoms | 0.74 (0.64, 0.83) | 40, 22 | < 0.001        | 1.21E-03 |
| Anti-chromatin IgM   | LN III, IV vs no renal symptoms | 0.65 (0.53, 0.75) | 40, 22 | 0.008          | 7.50E-02 |
| Anti-dsDNA IgE       | LN III, IV vs no renal symptoms | 0.70 (0.61, 0.79) | 40, 22 | < 0.001        | 4.87E-03 |

Anti-dsDNA = anti–double-stranded DNA; anti-ssDNA = Anti–single-stranded DNA; AUC = area under the curve; CI = confidence interval; FDR = false discovery rate; Ig = immunoglobulin; IV = intravenous; LN = lupus nephritis.

**Supplemental Table 2.** Analytes measured

| Name                                             | Type     | Platform        |
|--------------------------------------------------|----------|-----------------|
| Interleukin-21 (IL-21) (pg/ml)                   | Protein  | ELISA           |
| RF IgM (O.D.)                                    | Antibody | ELISA           |
| Ro IgG (O.D.) <sup>a</sup>                       | Antibody | ELISA           |
| dsDNA IgG (ug/ml) <sup>a</sup>                   | Antibody | ELISA           |
| IgM (ug/ml)                                      | Antibody | ELISA           |
| IgG (ug/ml)                                      | Antibody | ELISA           |
| dsDNA IgE                                        | Antibody | ELISA           |
| 6Ckine (pg/mL)                                   | Protein  | RBM Custom xMAP |
| Adiponectin (ug/mL)                              | Protein  | RBM Custom xMAP |
| Alpha-1 anti-trypsin (AAT) (mg/mL)               | Protein  | RBM Custom xMAP |
| Alpha-2-macroglobulin (A2Macro) (mg/mL)          | Protein  | RBM Custom xMAP |
| Angiopietin-2 (ANG-2) (ng/mL)                    | Protein  | RBM Custom xMAP |
| Apolipoprotein(a) (Lp(a)) (ug/mL)                | Protein  | RBM Custom xMAP |
| B-cell activating factor (BAFF) (pg/mL)          | Protein  | RBM Custom xMAP |
| B lymphocyte chemoattractant (BLC) (pg/mL)       | Protein  | RBM Custom xMAP |
| Beta-2-microglobulin (B2M) (ug/mL)               | Protein  | RBM Custom xMAP |
| Brain-derived neurotrophic factor (BDNF) (ng/mL) | Protein  | RBM Custom xMAP |
| C-reactive protein (CRP) (ug/mL)                 | Protein  | RBM Custom xMAP |
| Cancer antigen 15-3 (CA-15-3) (U/mL)             | Protein  | RBM Custom xMAP |

| Name                                                                 | Type    | Platform        |
|----------------------------------------------------------------------|---------|-----------------|
| CD 40 antigen (CD40) (ng/mL)                                         | Protein | RBM Custom xMAP |
| CD40 ligand (CD40-L) (ng/mL)                                         | Protein | RBM Custom xMAP |
| Complement C3 (C3) (mg/mL)                                           | Protein | RBM Custom xMAP |
| Creatine kinase-MB (CK-MB) (ng/mL)                                   | Protein | RBM Custom xMAP |
| Dickkopf-related protein 1 (DKK-1) (ng/mL)                           | Protein | RBM Custom xMAP |
| E-selectin (ng/mL)                                                   | Protein | RBM Custom xMAP |
| EN-RAGE (ng/mL)                                                      | Protein | RBM Custom xMAP |
| Eotaxin-1 (pg/mL)                                                    | Protein | RBM Custom xMAP |
| Eotaxin-2 (pg/mL)                                                    | Protein | RBM Custom xMAP |
| Eotaxin-3 (pg/mL)                                                    | Protein | RBM Custom xMAP |
| Epithelial-derived neutrophil-activating protein 78 (ENA-78) (ng/mL) | Protein | RBM Custom xMAP |
| Factor VII (ng/mL)                                                   | Protein | RBM Custom xMAP |
| Ferritin (FRTN) (ng/mL)                                              | Protein | RBM Custom xMAP |
| Fibrinogen (mg/mL)                                                   | Protein | RBM Custom xMAP |
| Granulocyte colony-stimulating factor (G-CSF) (pg/mL)                | Protein | RBM Custom xMAP |
| Granulocyte-macrophage colony-stimulating factor (GM-CSF) (pg/mL)    | Protein | RBM Custom xMAP |
| Haptoglobin (mg/mL)                                                  | Protein | RBM Custom xMAP |
| Immunoglobulin A (IgA) (mg/mL)                                       | Protein | RBM Custom xMAP |
| Immunoglobulin E (IgE) (U/mL)                                        | Protein | RBM Custom xMAP |
| Immunoglobulin M (IgM) (mg/mL)                                       | Protein | RBM Custom xMAP |

| Name                                                             | Type    | Platform        |
|------------------------------------------------------------------|---------|-----------------|
| Insulin-like growth factor-binding protein 2 (IGFBP-2) (ng/mL)   | Protein | RBM Custom xMAP |
| Intercellular adhesion molecule 1 (ICAM-1) (ng/mL)               | Protein | RBM Custom xMAP |
| Interferon alpha (IFN-alpha) (ng/mL)                             | Protein | RBM Custom xMAP |
| Interferon gamma (IFN-gamma) (pg/mL)                             | Protein | RBM Custom xMAP |
| Interferon-gamma-induced protein 10 (IP-10) (pg/mL)              | Protein | RBM Custom xMAP |
| Interferon-inducible T-cell alpha chemoattractant (ITAC) (pg/mL) | Protein | RBM Custom xMAP |
| Interleukin-1 alpha (IL-1 alpha) (ng/mL)                         | Protein | RBM Custom xMAP |
| Interleukin-1 beta (IL-1 beta) (pg/mL)                           | Protein | RBM Custom xMAP |
| Interleukin-1 receptor antagonist (IL-1ra) (pg/mL)               | Protein | RBM Custom xMAP |
| Interleukin-2 (IL-2) (pg/mL)                                     | Protein | RBM Custom xMAP |
| Interleukin-2 receptor alpha (IL-2 receptor alpha) (pg/mL)       | Protein | RBM Custom xMAP |
| Interleukin-3 (IL-3) (ng/mL)                                     | Protein | RBM Custom xMAP |
| Interleukin-4 (IL-4) (pg/mL)                                     | Protein | RBM Custom xMAP |
| Interleukin-5 (IL-5) (pg/mL)                                     | Protein | RBM Custom xMAP |
| Interleukin-6 (IL-6) (pg/mL)                                     | Protein | RBM Custom xMAP |
| Interleukin-6 receptor (IL-6r) (ng/mL)                           | Protein | RBM Custom xMAP |
| Interleukin-7 (IL-7) (pg/mL)                                     | Protein | RBM Custom xMAP |
| Interleukin-8 (IL-8) (pg/mL)                                     | Protein | RBM Custom xMAP |
| Interleukin-10 (IL-10) (pg/mL)                                   | Protein | RBM Custom xMAP |
| Interleukin-12 subunit p40 (IL-12p40) (ng/mL)                    | Protein | RBM Custom xMAP |

| Name                                                                                 | Type    | Platform        |
|--------------------------------------------------------------------------------------|---------|-----------------|
| Interleukin-12 subunit p70 (IL-12p70) (pg/mL)                                        | Protein | RBM Custom xMAP |
| Interleukin-13 (IL-13) (pg/mL)                                                       | Protein | RBM Custom xMAP |
| Interleukin-15 (IL-15) (ng/mL)                                                       | Protein | RBM Custom xMAP |
| Interleukin-16 (IL-16) (pg/mL)                                                       | Protein | RBM Custom xMAP |
| Interleukin-17 (IL-17) (pg/mL)                                                       | Protein | RBM Custom xMAP |
| Interleukin-18 (IL-18) (pg/mL)                                                       | Protein | RBM Custom xMAP |
| Interleukin-22 (IL-22) (ng/mL)                                                       | Protein | RBM Custom xMAP |
| Interleukin-23 (IL-23) (ng/mL)                                                       | Protein | RBM Custom xMAP |
| Interleukin-31 (IL-31) (ng/mL)                                                       | Protein | RBM Custom xMAP |
| Latency-associated peptide of transforming growth factor beta-1 (LAP TGF-b1) (ng/mL) | Protein | RBM Custom xMAP |
| Macrophage-derived chemokine (MDC) (pg/mL)                                           | Protein | RBM Custom xMAP |
| Macrophage inflammatory protein-1 alpha (MIP-1 alpha) (pg/mL)                        | Protein | RBM Custom xMAP |
| Macrophage inflammatory protein-1 beta (MIP-1 beta) (pg/mL)                          | Protein | RBM Custom xMAP |
| Macrophage inflammatory protein-3 alpha (MIP-3 alpha) (pg/mL)                        | Protein | RBM Custom xMAP |
| Macrophage inflammatory protein-3 beta (MIP-3 beta) (pg/mL)                          | Protein | RBM Custom xMAP |
| Macrophage migration inhibitory factor (MIF) (ng/mL)                                 | Protein | RBM Custom xMAP |
| Matrix metalloproteinase-3 (MMP-3) (ng/mL)                                           | Protein | RBM Custom xMAP |
| Matrix metalloproteinase-9 (MMP-9) (ng/mL)                                           | Protein | RBM Custom xMAP |
| Monocyte chemotactic protein-1 (MCP-1) (pg/mL)                                       | Protein | RBM Custom xMAP |
| Monocyte chemotactic protein-2 (MCP-2) (pg/mL)                                       | Protein | RBM Custom xMAP |

| Name                                                                | Type    | Platform        |
|---------------------------------------------------------------------|---------|-----------------|
| Monocyte chemotactic protein-4 (MCP-4) (pg/mL)                      | Protein | RBM Custom xMAP |
| Monokine induced by gamma interferon (MIG) (pg/mL)                  | Protein | RBM Custom xMAP |
| Myeloid progenitor inhibitory factor-1 (MPIF-1) (ng/mL)             | Protein | RBM Custom xMAP |
| Myeloperoxidase (MPO) (ng/mL)                                       | Protein | RBM Custom xMAP |
| Myoglobin (ng/mL)                                                   | Protein | RBM Custom xMAP |
| Osteoprotegerin (OPG) (pM)                                          | Protein | RBM Custom xMAP |
| Plasminogen activator inhibitor-1 (PAI-1) (ng/mL)                   | Protein | RBM Custom xMAP |
| Prostate-specific antigen, free (PSA-f) (ng/mL)                     | Protein | RBM Custom xMAP |
| Serum amyloid P component (SAP) (ug/mL)                             | Protein | RBM Custom xMAP |
| Sex hormone-binding globulin (SHBG) (mmol/L)                        | Protein | RBM Custom xMAP |
| Stem cell factor (SCF) (pg/mL)                                      | Protein | RBM Custom xMAP |
| Stromal cell-derived factor-1 (SDF-1) (pg/mL)                       | Protein | RBM Custom xMAP |
| T-cell-specific protein RANTES (ng/mL)                              | Protein | RBM Custom xMAP |
| Thrombospondin-1 (ng/mL)                                            | Protein | RBM Custom xMAP |
| Thymus and activation-regulated chemokine (TARC) (ng/mL)            | Protein | RBM Custom xMAP |
| Thyroxine-binding globulin (TBG) (ug/mL)                            | Protein | RBM Custom xMAP |
| Tissue inhibitor of metalloproteinases-1 (TIMP-1) (ng/mL)           | Protein | RBM Custom xMAP |
| Tumour necrosis factor alpha (TNF-alpha) (pg/mL)                    | Protein | RBM Custom xMAP |
| Tumour necrosis factor beta (TNF-beta) (pg/mL)                      | Protein | RBM Custom xMAP |
| Tumour necrosis factor ligand superfamily member 12 (Tweak) (ng/mL) | Protein | RBM Custom xMAP |

| Name                                                                | Type     | Platform                    |
|---------------------------------------------------------------------|----------|-----------------------------|
| Tumour necrosis factor ligand superfamily member 13 (APRIL) (ng/mL) | Protein  | RBM Custom xMAP             |
| Tumour necrosis factor receptor I (TNF RI) (pg/mL)                  | Protein  | RBM Custom xMAP             |
| Tumour necrosis factor receptor 2 (TNFR2) (ng/mL)                   | Protein  | RBM Custom xMAP             |
| Vascular cell adhesion molecule-1 (VCAM-1) (ng/mL)                  | Protein  | RBM Custom xMAP             |
| Vascular endothelial growth factor (VEGF) (pg/mL)                   | Protein  | RBM Custom xMAP             |
| Vitamin D binding protein (VDBP) (ug/mL)                            | Protein  | RBM Custom xMAP             |
| Vitronectin (ug/mL)                                                 | Protein  | RBM Custom xMAP             |
| von Willebrand factor (vWF) (ug/mL)                                 | Protein  | RBM Custom xMAP             |
| Anti-aggrecan IgA, IgG, IgM                                         | Antibody | UTSW Autoantigen Microarray |
| Anti-alpha-actinin IgA, IgG, IgM                                    | Antibody | UTSW Autoantigen Microarray |
| Anti-amyloid IgA, IgG, IgM                                          | Antibody | UTSW Autoantigen Microarray |
| Anti-beta 2-glycoprotein I IgA, IgG, IgM                            | Antibody | UTSW Autoantigen Microarray |
| Anti-beta 2-microglobulin IgA, IgG, IgM                             | Antibody | UTSW Autoantigen Microarray |
| Anti-BPI IgA, IgG, IgM                                              | Antibody | UTSW Autoantigen Microarray |
| Anti-C1q IgA, IgG, IgM                                              | Antibody | UTSW Autoantigen Microarray |
| Anti-cardiolipin IgA, IgG, IgM                                      | Antibody | UTSW Autoantigen Microarray |
| Anti-CENP-A IgA, IgG, IgM                                           | Antibody | UTSW Autoantigen Microarray |
| Anti-CENP-B IgA, IgG, IgM                                           | Antibody | UTSW Autoantigen Microarray |
| Anti-chondroitin sulfate C IgA, IgG, IgM                            | Antibody | UTSW Autoantigen Microarray |
| Anti-chromatin IgA, IgG, IgM                                        | Antibody | UTSW Autoantigen Microarray |



| Name                                      | Type     | Platform                    |
|-------------------------------------------|----------|-----------------------------|
| Anti-collagen I IgA, IgG, IgM             | Antibody | UTSW Autoantigen Microarray |
| Anti-collagen II IgA, IgG, IgM            | Antibody | UTSW Autoantigen Microarray |
| Anti-collagen III IgA, IgG, IgM           | Antibody | UTSW Autoantigen Microarray |
| Anti-collagen IV IgA, IgG, IgM            | Antibody | UTSW Autoantigen Microarray |
| Anti-collagen V IgA, IgG, IgM             | Antibody | UTSW Autoantigen Microarray |
| Anti-collagen VI IgA, IgG, IgM            | Antibody | UTSW Autoantigen Microarray |
| Anti-cytochrome C IgA, IgG, IgM           | Antibody | UTSW Autoantigen Microarray |
| Anti-decorin-bovine IgA, IgG, IgM         | Antibody | UTSW Autoantigen Microarray |
| Anti-DGPS IgA, IgG, IgM                   | Antibody | UTSW Autoantigen Microarray |
| Anti-ds RNA IgA, IgG, IgM                 | Antibody | UTSW Autoantigen Microarray |
| Anti-dsDNA IgA, IgG, IgM                  | Antibody | UTSW Autoantigen Microarray |
| Anti-elastin IgA, IgG, IgM                | Antibody | UTSW Autoantigen Microarray |
| Anti-entactin EDTA IgA, IgG, IgM          | Antibody | UTSW Autoantigen Microarray |
| Anti-fibrinogen IV IgA, IgG, IgM          | Antibody | UTSW Autoantigen Microarray |
| Anti-fibrinogen S IgA, IgG, IgM           | Antibody | UTSW Autoantigen Microarray |
| Anti-fibronectin IgA, IgG, IgM            | Antibody | UTSW Autoantigen Microarray |
| Anti-GBM-dissociated IgA, IgG, IgM        | Antibody | UTSW Autoantigen Microarray |
| Anti-gliadin-IgG IgA, IgG, IgM            | Antibody | UTSW Autoantigen Microarray |
| Anti-glycated albumin-human IgA, IgG, IgM | Antibody | UTSW Autoantigen Microarray |
| Anti-GP2 IgA, IgG, IgM                    | Antibody | UTSW Autoantigen Microarray |

| Name                                                     | Type     | Platform                    |
|----------------------------------------------------------|----------|-----------------------------|
| Anti-gP210 IgA, IgG, IgM                                 | Antibody | UTSW Autoantigen Microarray |
| Anti-haemocyanin IgA, IgG, IgM                           | Antibody | UTSW Autoantigen Microarray |
| Anti-heparan HSPG IgA, IgG, IgM                          | Antibody | UTSW Autoantigen Microarray |
| Anti-heparin IgA, IgG, IgM                               | Antibody | UTSW Autoantigen Microarray |
| Anti-heparan Sulfate IgA, IgG, IgM                       | Antibody | UTSW Autoantigen Microarray |
| Anti-histone H3 IgA, IgG, IgM                            | Antibody | UTSW Autoantigen Microarray |
| Anti-histone H4 IgA, IgG, IgM                            | Antibody | UTSW Autoantigen Microarray |
| Anti-histone H1 IgA, IgG, IgM                            | Antibody | UTSW Autoantigen Microarray |
| Anti-histone H2A IgA, IgG, IgM                           | Antibody | UTSW Autoantigen Microarray |
| Anti-histone H2B IgA, IgG, IgM                           | Antibody | UTSW Autoantigen Microarray |
| Anti-histone-total IgA, IgG, IgM                         | Antibody | UTSW Autoantigen Microarray |
| Anti-intrinsic factor IgA, IgG, IgM                      | Antibody | UTSW Autoantigen Microarray |
| Anti-Jo-1 IgA, IgG, IgM                                  | Antibody | UTSW Autoantigen Microarray |
| Anti-KU-P70/P80 IgA, IgG, IgM                            | Antibody | UTSW Autoantigen Microarray |
| Anti-La/SSB IgA, IgG, IgM                                | Antibody | UTSW Autoantigen Microarray |
| Anti-laminin IgA, IgG, IgM                               | Antibody | UTSW Autoantigen Microarray |
| Anti-LC1 IgA, IgG, IgM                                   | Antibody | UTSW Autoantigen Microarray |
| Anti-LKM1 IgA, IgG, IgM                                  | Antibody | UTSW Autoantigen Microarray |
| Anti-M2 antigen IgA, IgG, IgM                            | Antibody | UTSW Autoantigen Microarray |
| Anti-MAG-myelin-associated glycoprotein-FC IgA, IgG, IgM | Antibody | UTSW Autoantigen Microarray |

| Name                                        | Type     | Platform                    |
|---------------------------------------------|----------|-----------------------------|
| Anti-matrigel IgA, IgG, IgM                 | Antibody | UTSW Autoantigen Microarray |
| Anti-MBP-myelin basic protein IgA, IgG, IgM | Antibody | UTSW Autoantigen Microarray |
| Anti-Mi-2 IgA, IgG, IgM                     | Antibody | UTSW Autoantigen Microarray |
| Anti-mitochondrial antigen IgA, IgG, IgM    | Antibody | UTSW Autoantigen Microarray |
| Anti-MPO IgA, IgG, IgM                      | Antibody | UTSW Autoantigen Microarray |
| Anti-myosin IgA, IgG, IgM                   | Antibody | UTSW Autoantigen Microarray |
| Anti-nucleolin IgA, IgG, IgM                | Antibody | UTSW Autoantigen Microarray |
| Anti-nucleosome antigen IgA, IgG, IgM       | Antibody | UTSW Autoantigen Microarray |
| Anti-Nup62 IgA, IgG, IgM                    | Antibody | UTSW Autoantigen Microarray |
| Anti-PCNA IgA, IgG, IgM                     | Antibody | UTSW Autoantigen Microarray |
| Anti-peroxiredoxin 1 IgA, IgG, IgM          | Antibody | UTSW Autoantigen Microarray |
| Anti-phosphatidylinositol IgA, IgG, IgM     | Antibody | UTSW Autoantigen Microarray |
| Anti-PL-12 IgA, IgG, IgM                    | Antibody | UTSW Autoantigen Microarray |
| Anti-PL-7 IgA, IgG, IgM                     | Antibody | UTSW Autoantigen Microarray |
| Anti-PM/Scl-100 IgA, IgG, IgM               | Antibody | UTSW Autoantigen Microarray |
| Anti-PM/Scl-75 IgA, IgG, IgM                | Antibody | UTSW Autoantigen Microarray |
| Anti-PR3 IgA, IgG, IgM                      | Antibody | UTSW Autoantigen Microarray |
| Anti-proteoglycan IgA, IgG, IgM             | Antibody | UTSW Autoantigen Microarray |
| Anti-prothrombin protein IgA, IgG, IgM      | Antibody | UTSW Autoantigen Microarray |
| Anti-ribo phosphoprotein P1 IgA, IgG, IgM   | Antibody | UTSW Autoantigen Microarray |

| Name                                      | Type     | Platform                    |
|-------------------------------------------|----------|-----------------------------|
| Anti-ribo phosphoprotein P2 IgA, IgG, IgM | Antibody | UTSW Autoantigen Microarray |
| Anti-ribo phosphoprotein P0 IgA, IgG, IgM | Antibody | UTSW Autoantigen Microarray |
| Anti-Ro/SSA-52KDa IgA, IgG, IgM           | Antibody | UTSW Autoantigen Microarray |
| Anti-Ro/SSA-60KDa IgA, IgG, IgM           | Antibody | UTSW Autoantigen Microarray |
| Anti-Scl-70 IgA, IgG, IgM                 | Antibody | UTSW Autoantigen Microarray |
| Anti-Sm IgA, IgG, IgM                     | Antibody | UTSW Autoantigen Microarray |
| Anti-Sm/RNP IgA, IgG, IgM                 | Antibody | UTSW Autoantigen Microarray |
| Anti-SmD IgA, IgG, IgM                    | Antibody | UTSW Autoantigen Microarray |
| Anti-SP100 IgA, IgG, IgM                  | Antibody | UTSW Autoantigen Microarray |
| Anti-sphingomyelin IgA, IgG, IgM          | Antibody | UTSW Autoantigen Microarray |
| Anti-SRP54 IgA, IgG, IgM                  | Antibody | UTSW Autoantigen Microarray |
| Anti-ssDNA IgA, IgG, IgM                  | Antibody | UTSW Autoantigen Microarray |
| Anti-thyroglobulin IgA, IgG, IgM          | Antibody | UTSW Autoantigen Microarray |
| Anti-topoisomerase I IgA, IgG, IgM        | Antibody | UTSW Autoantigen Microarray |
| Anti-TPO IgA, IgG, IgM                    | Antibody | UTSW Autoantigen Microarray |
| Anti-TTG IgA, IgG, IgM                    | Antibody | UTSW Autoantigen Microarray |
| Anti-U1-snRNP-68 IgA, IgG, IgM            | Antibody | UTSW Autoantigen Microarray |
| Anti-U1-snRNP-A IgA, IgG, IgM             | Antibody | UTSW Autoantigen Microarray |
| Anti-U1-snRNP-BB IgA, IgG, IgM            | Antibody | UTSW Autoantigen Microarray |
| Anti-U1-snRNP-C IgA, IgG, IgM             | Antibody | UTSW Autoantigen Microarray |

| Name                           | Type     | Platform                    |
|--------------------------------|----------|-----------------------------|
| Anti-vimentin IgA, IgG, IgM    | Antibody | UTSW Autoantigen Microarray |
| Anti-vitronectin IgA, IgG, IgM | Antibody | UTSW Autoantigen Microarray |

<sup>a</sup> Denotes antibodies measured by ELISA that were also included in the UTSW Autoantigen Microarray.

**Supplemental Table 3.** Analytes associated with glomerulonephritis (LN III, LN IV, LN V)

| Variable                                          | Comparison                  | AUC (95% CI)      | N      | Mann–Whitney    | FDR      |
|---------------------------------------------------|-----------------------------|-------------------|--------|-----------------|----------|
|                                                   |                             |                   |        | <i>P</i> value* |          |
| CD 40 antigen (CD40)                              | All LN vs no renal symptoms | 0.70 (0.61, 0.79) | 96, 64 | 1.39E-05        | 4.45E-04 |
| Fibrinogen                                        | All LN vs no renal symptoms | 0.71 (0.62, 0.79) | 96, 64 | 7.19E-06        | 2.34E-04 |
| Interleukin-1 beta (IL-1 beta)                    | All LN vs no renal symptoms | 0.74 (0.66, 0.81) | 96, 64 | 4.20E-07        | 4.14E-05 |
| Interleukin-1 receptor antagonist (IL-1ra)        | All LN vs no renal symptoms | 0.66 (0.58, 0.75) | 96, 64 | 4.72E-04        | 5.39E-03 |
| Interleukin-22 (IL-22)                            | All LN vs no renal symptoms | 0.71 (0.62, 0.78) | 96, 64 | 6.23E-06        | 2.32E-04 |
| Stem cell factor (SCF)                            | All LN vs no renal symptoms | 0.70 (0.62, 0.78) | 96, 64 | 1.43E-05        | 3.96E-04 |
| Tissue inhibitor of metalloproteinases 1 (TIMP-1) | All LN vs no renal symptoms | 0.75 (0.67, 0.82) | 96, 64 | 8.49E-08        | 1.69E-05 |
| Tumour necrosis factor receptor 2 (TNFR2)         | All LN vs no renal symptoms | 0.77 (0.70, 0.84) | 96, 64 | 4.31E-09        | 2.21E-06 |
| Vascular cell adhesion molecule-1 (VCAM-1)        | All LN vs no renal symptoms | 0.74 (0.66, 0.81) | 96, 64 | 4.41E-07        | 4.84E-05 |
| Vascular endothelial growth factor (VEGF)         | All LN vs no renal symptoms | 0.72 (0.64, 0.81) | 96, 64 | 1.79E-06        | 1.15E-04 |
| CD 40 antigen (CD40)                              | LN III vs no renal symptoms | 0.75 (0.6, 0.88)  | 96, 18 | 7.84E-04        | --       |
| Fibrinogen                                        | LN III vs no renal symptoms | 0.73 (0.56, 0.88) | 96, 18 | 1.65E-03        | --       |
| Interleukin-1 beta (IL-1 beta)                    | LN III vs no renal symptoms | 0.67 (0.52, 0.81) | 96, 18 | 2.20E-02        | --       |
| Interleukin-1 receptor antagonist (IL-1ra)        | LN III vs no renal symptoms | 0.68 (0.52, 0.82) | 96, 18 | 1.75E-02        | --       |
| Interleukin-22 (IL-22)                            | LN III vs no renal symptoms | 0.75 (0.6, 0.87)  | 96, 18 | 6.13E-04        | --       |
| Stem cell factor (SCF)                            | LN III vs no renal symptoms | 0.67 (0.50, 0.82) | 96, 18 | 2.62E-02        | --       |
| Tissue inhibitor of metalloproteinases 1 (TIMP-1) | LN III vs no renal symptoms | 0.77 (0.64, 0.88) | 96, 18 | 3.10E-04        | --       |
| Tumour necrosis factor receptor 2 (TNFR2)         | LN III vs no renal symptoms | 0.84 (0.73, 0.93) | 96, 18 | 5.15E-06        | --       |

| Variable                                          | Comparison                  | AUC (95% CI)      | N      | Mann–Whitney    | FDR |
|---------------------------------------------------|-----------------------------|-------------------|--------|-----------------|-----|
|                                                   |                             |                   |        | <i>P</i> value* |     |
| Vascular cell adhesion molecule-1 (VCAM-1)        | LN III vs no renal symptoms | 0.74 (0.62, 0.85) | 96, 18 | 1.13E-03        | --  |
| Vascular endothelial growth factor (VEGF)         | LN III vs no renal symptoms | 0.67 (0.51, 0.82) | 96, 18 | 2.54E-02        | --  |
| CD 40 antigen (CD40)                              | LN IV vs no renal symptoms  | 0.71 (0.57, 0.84) | 96, 23 | 1.42E-03        | --  |
| Fibrinogen                                        | LN IV vs no renal symptoms  | 0.67 (0.54, 0.80) | 96, 23 | 1.02E-02        | --  |
| Interleukin-1 beta (IL-1 beta)                    | LN IV vs no renal symptoms  | 0.74 (0.62, 0.83) | 96, 23 | 4.61E-04        | --  |
| Interleukin-1 receptor antagonist (IL-1ra)        | LN IV vs no renal symptoms  | 0.65 (0.53, 0.76) | 96, 23 | 2.58E-02        | --  |
| Interleukin-22 (IL-22)                            | LN IV vs no renal symptoms  | 0.71 (0.58, 0.83) | 96, 23 | 1.40E-03        | --  |
| Stem cell factor (SCF)                            | LN IV vs no renal symptoms  | 0.77 (0.67, 0.86) | 96, 23 | 5.65E-05        | --  |
| Tissue inhibitor of metalloproteinases 1 (TIMP-1) | LN IV vs no renal symptoms  | 0.77 (0.65, 0.87) | 96, 23 | 7.13E-05        | --  |
| Tumour necrosis factor receptor 2 (TNFR2)         | LN IV vs no renal symptoms  | 0.84 (0.74, 0.92) | 96, 23 | 6.41E-07        | --  |
| Vascular cell adhesion molecule-1 (VCAM-1)        | LN IV vs no renal symptoms  | 0.76 (0.66, 0.85) | 96, 23 | 1.29E-04        | --  |
| Vascular endothelial growth factor (VEGF)         | LN IV vs no renal symptoms  | 0.73 (0.62, 0.84) | 96, 23 | 5.07E-04        | --  |
| CD 40 antigen (CD40)                              | LN V vs no renal symptoms   | 0.65 (0.51, 0.79) | 96, 23 | 2.19E-02        | --  |
| Fibrinogen                                        | LN V vs no renal symptoms   | 0.73 (0.61, 0.84) | 96, 23 | 7.46E-04        | --  |
| Interleukin-1 beta (IL-1 beta)                    | LN V vs no renal symptoms   | 0.79 (0.68, 0.88) | 96, 23 | 1.70E-05        | --  |
| Interleukin-1 receptor antagonist (IL-1ra)        | LN V vs no renal symptoms   | 0.67 (0.55, 0.78) | 96, 23 | 1.37E-02        | --  |
| Interleukin-22 (IL-22)                            | LN V vs no renal symptoms   | 0.67 (0.53, 0.80) | 96, 23 | 7.91E-03        | --  |
| Stem cell factor (SCF)                            | LN V vs no renal symptoms   | 0.66 (0.53, 0.79) | 96, 23 | 1.52E-02        | --  |
| Tissue inhibitor of metalloproteinases 1 (TIMP-1) | LN V vs no renal symptoms   | 0.72 (0.59, 0.84) | 96, 23 | 1.16E-03        | --  |

| Variable                                   | Comparison                | AUC (95% CI)      | N      | Mann–Whitney    | FDR |
|--------------------------------------------|---------------------------|-------------------|--------|-----------------|-----|
|                                            |                           |                   |        | <i>P</i> value* |     |
| Tumour necrosis factor receptor 2 (TNFR2)  | LN V vs no renal symptoms | 0.66 (0.53, 0.79) | 96, 23 | 1.58E-02        | --  |
| Vascular cell adhesion molecule-1 (VCAM-1) | LN V vs no renal symptoms | 0.71 (0.59, 0.81) | 96, 23 | 1.92E-03        | --  |
| Vascular endothelial growth factor (VEGF)  | LN V vs no renal symptoms | 0.76 (0.63, 0.87) | 96, 23 | 1.39E-04        | --  |

\*Mann–Whitney adjusted *P* value < 0.10, elevated in each subset *P* value < 0.05.

AUC = area under the curve; CI = confidence interval; FDR = false discovery rate; IV = intravenous; LN = lupus nephritis.



**Supplemental Table 4.** Correlation between proteins associated with glomerulonephritis and renal LAI and renal SLEDAI

| Variable                                          | Comparison   | Spearman's R<br>(95% CI) | N   | P value  |
|---------------------------------------------------|--------------|--------------------------|-----|----------|
| CD 40 antigen (CD40)                              | Renal LAI    | 0.34 (0.48, 0.19)        | 186 | 2.74E-06 |
| Fibrinogen                                        | Renal LAI    | 0.32 (0.47, 0.18)        | 186 | 6.62E-06 |
| Interleukin-1 beta (IL-1 beta)                    | Renal LAI    | 0.32 (0.47, 0.18)        | 186 | 7.97E-06 |
| Interleukin-1 receptor antagonist (IL-1ra)        | Renal LAI    | 0.33 (0.48, 0.19)        | 186 | 4.14E-06 |
| Interleukin-22 (IL-22)                            | Renal LAI    | 0.35 (0.49, 0.20)        | 186 | 1.09E-06 |
| Stem cell factor (SCF)                            | Renal LAI    | 0.34 (0.49, 0.20)        | 186 | 1.80E-06 |
| Tissue inhibitor of metalloproteinases 1 (TIMP-1) | Renal LAI    | 0.46 (0.61, 0.32)        | 186 | 3.57E-11 |
| Tumour necrosis factor receptor 2 (TNFR2)         | Renal LAI    | 0.39 (0.53, 0.24)        | 186 | 3.86E-08 |
| Vascular cell adhesion molecule-1 (VCAM-1)        | Renal LAI    | 0.31 (0.45, 0.16)        | 186 | 1.77E-05 |
| Vascular endothelial growth factor (VEGF)         | Renal LAI    | 0.38 (0.52, 0.23)        | 186 | 1.09E-07 |
| CD 40 antigen (CD40)                              | Renal SLEDAI | 0.29 (0.43, 0.14)        | 186 | 6.00E-05 |
| Fibrinogen                                        | Renal SLEDAI | 0.28 (0.43, 0.14)        | 186 | 1.06E-04 |
| Interleukin-1 beta (IL-1 beta)                    | Renal SLEDAI | 0.27 (0.41, 0.12)        | 186 | 2.42E-04 |
| Interleukin-1 receptor antagonist (IL-1ra)        | Renal SLEDAI | 0.28 (0.42, 0.13)        | 186 | 1.18E-04 |
| Interleukin-22 (IL-22)                            | Renal SLEDAI | 0.19 (0.33, 0.04)        | 186 | 1.00E-02 |
| Stem cell factor (SCF)                            | Renal SLEDAI | 0.27 (0.41, 0.12)        | 186 | 2.33E-04 |
| Tissue inhibitor of metalloproteinases 1 (TIMP-1) | Renal SLEDAI | 0.33 (0.47, 0.18)        | 186 | 4.49E-06 |
| Tumour necrosis factor receptor 2 (TNFR2)         | Renal SLEDAI | 0.30 (0.45, 0.16)        | 186 | 2.75E-05 |
| Vascular cell adhesion molecule-1 (VCAM-1)        | Renal SLEDAI | 0.20 (0.35, 0.06)        | 186 | 5.49E-03 |
| Vascular endothelial growth factor (VEGF)         | Renal SLEDAI | 0.24 (0.38, 0.09)        | 186 | 1.15E-03 |

LAI = Lupus Activity Index; SLEDAI = Systemic Lupus Erythematosus Disease Activity Index.

**Supplemental Table 5.** Logistic regression model measuring independent associations between plasma protein and presence of renal symptoms or lupus nephritis\*

|                                           | Coefficient (95% CI) | <i>P</i> value |
|-------------------------------------------|----------------------|----------------|
| Intercept                                 | -4.30 (-5.9, -2.9)   | < 0.001        |
| Tumour necrosis factor receptor 2 (TNFR2) | 0.14 (0.076, 0.22)   | < 0.001        |
| Interleukin-1 beta (IL-1 beta)            | 0.24 (0.032, 0.41)   | 0.0038         |
| Fibrinogen                                | 0.50 (0.14, 0.87)    | 0.0074         |

\*Mean 10 iterations 5-fold cross validation (AUC = 0.80, Sensitivity = 0.63, Specificity = 0.89).  
AUC = area under the curve.

**Supplemental Table 6.** Analytes associated with discoid lupus

| Variable                        | Comparison                       | AUC (95% CI)      | N      | Mann–Whitney    | FDR      |
|---------------------------------|----------------------------------|-------------------|--------|-----------------|----------|
|                                 |                                  |                   |        | <i>P</i> value* |          |
| Interleukin-21 (IL-21)          | Discoid vs no cutaneous symptoms | 0.28 (0.17, 0.41) | 77, 25 | 1.27E-03        | 4.00E-02 |
| Interleukin-23 (IL-23)          | Discoid vs no cutaneous symptoms | 0.67 (0.55, 0.79) | 85, 25 | 8.51E-03        | 9.57E-02 |
| Serum amyloid P-component (SAP) | Discoid vs no cutaneous symptoms | 0.68 (0.57, 0.79) | 85, 25 | 5.55E-03        | 8.78E-02 |
| IgA - beta 2-microglobulin      | Discoid vs no cutaneous symptoms | 0.73 (0.61, 0.83) | 78, 23 | 1.05E-03        | 3.47E-02 |
| IgA - KU-P70/P80                | Discoid vs no cutaneous symptoms | 0.71 (0.57, 0.83) | 78, 23 | 2.92E-03        | 7.05E-02 |
| IgA - LC1                       | Discoid vs no cutaneous symptoms | 0.69 (0.58, 0.8)  | 78, 23 | 4.77E-03        | 8.56E-02 |
| IgA - TTG                       | Discoid vs no cutaneous symptoms | 0.73 (0.61, 0.84) | 78, 23 | 9.67E-04        | 3.74E-02 |
| IgG - fibrinogen IV             | Discoid vs no cutaneous symptoms | 0.68 (0.55, 0.8)  | 78, 23 | 9.00E-03        | 9.58E-02 |
| IgG - histone H4                | Discoid vs no cutaneous symptoms | 0.74 (0.64, 0.84) | 78, 23 | 3.36E-04        | 2.11E-02 |
| IgG - peroxiredoxin 1           | Discoid vs no cutaneous symptoms | 0.78 (0.68, 0.86) | 78, 23 | 6.01E-05        | 7.54E-03 |
| IgG - U1-snRNP-C                | Discoid vs no cutaneous symptoms | 0.68 (0.57, 0.8)  | 78, 23 | 7.62E-03        | 9.58E-02 |
| Interleukin-21 (IL-21)          | Discoid vs acute cutaneous lupus | 0.34 (0.21, 0.48) | 46, 25 | 2.66E-02        | --       |
| Interleukin-23 (IL-23)          | Discoid vs acute cutaneous lupus | 0.71 (0.57, 0.83) | 49, 25 | 3.83E-03        | --       |
| Serum amyloid P-component (SAP) | Discoid vs acute cutaneous lupus | 0.73 (0.6, 0.84)  | 49, 25 | 1.18E-03        | --       |
| IgA - beta 2-microglobulin      | Discoid vs acute cutaneous lupus | 0.65 (0.51, 0.79) | 48, 23 | 3.73E-02        | --       |
| IgA - KU-P70/P80                | Discoid vs acute cutaneous lupus | 0.72 (0.59, 0.85) | 48, 23 | 2.36E-03        | --       |
| IgA - LC1                       | Discoid vs acute cutaneous lupus | 0.7 (0.57, 0.81)  | 48, 23 | 8.10E-03        | --       |
| IgA - TTG                       | Discoid vs acute cutaneous lupus | 0.71 (0.59, 0.83) | 48, 23 | 3.96E-03        | --       |
| IgG - fibrinogen IV             | Discoid vs acute cutaneous lupus | 0.6 (0.46, 0.74)  | 48, 23 | 1.63E-01        | --       |
| IgG - histone H4                | Discoid vs acute cutaneous lupus | 0.83 (0.73, 0.91) | 48, 23 | 6.67E-06        | --       |
| IgG - peroxiredoxin 1           | Discoid vs acute cutaneous lupus | 0.78 (0.66, 0.88) | 48, 23 | 1.30E-04        | --       |
| IgG - U1-snRNP-C                | Discoid vs acute cutaneous lupus | 0.7 (0.58, 0.82)  | 48, 23 | 6.26E-03        | --       |

\*Mann–Whitney adjusted *P* value < 0.10.

AUC = area under the curve; FDR = false discovery rate.

**Supplemental Table 7.** Distribution of disease activity scores in cohort

|                              | All SLE<br>(n = 189) | Discoid<br>(n = 25) | LN III<br>(n = 18) | LN IV<br>(n = 23) | LN V<br>(n = 23) | Thrombocytopenia<br>(n = 25) | ACL<br>(n = 50) | Sjögren's<br>(n = 25) |
|------------------------------|----------------------|---------------------|--------------------|-------------------|------------------|------------------------------|-----------------|-----------------------|
| <b>SLEDAI</b>                |                      |                     |                    |                   |                  |                              |                 |                       |
| Seizure (%)                  | 0                    | 0                   | 0                  | 0                 | 0                | 0                            | 0               | 0                     |
| Psychosis (%)                | 0                    | 0                   | 0                  | 0                 | 0                | 0                            | 0               | 0                     |
| Organic brain syndrome (%)   | 0                    | 0                   | 0                  | 0                 | 0                | 0                            | 0               | 0                     |
| Visual disturbance (%)       | 2                    | 4                   | 0                  | 0                 | 0                | 0                            | 0               | 8                     |
| Cranial nerve disorder (%)   | 1                    | 0                   | 0                  | 4                 | 0                | 0                            | 0               | 0                     |
| Lupus headache (%)           | 0                    | 0                   | 0                  | 0                 | 0                | 0                            | 0               | 0                     |
| Cerebrovascular accident (%) |                      |                     |                    |                   |                  |                              |                 |                       |
| Vasculitis (%)               | 3                    | 8                   | 0                  | 4                 | 0                | 0                            | 4               | 0                     |
| Urinary Casts (%)            | 1                    | 0                   | 6                  | 0                 | 0                | 0                            | 0               | 0                     |
| Haematuria (%)               | 6                    | 8                   | 22                 | 0                 | 4                | 0                            | 6               | 4                     |
| Proteinuria (%)              | 11                   | 16                  | 6                  | 13                | 13               | 13                           | 6               | 12                    |
| Pyuria (%)                   | 3                    | 0                   | 17                 | 0                 | 9                | 0                            | 0               | 0                     |
| Arthritis (%)                | 9                    | 0                   | 6                  | 4                 | 0                | 13                           | 14              | 16                    |
| Myositis (%)                 | 1                    | 0                   | 0                  | 0                 | 0                | 0                            | 2               | 0                     |
| Low complement (%)           | 45                   | 56                  | 50                 | 61                | 43               | 48                           | 32              | 40                    |
| Increased DNA binding (%)    | 41                   | 40                  | 56                 | 70                | 26               | 43                           | 30              | 36                    |
| Rash (%)                     | 34                   | 16                  | 0                  | 9                 | 9                | 17                           | 100             | 8                     |
| Alopecia (%)                 | 9                    | 4                   | 28                 | 4                 | 13               | 0                            | 12              | 4                     |

|                             | All SLE<br>(n = 189) | Discoid<br>(n = 25) | LN III<br>(n = 18) | LN IV<br>(n = 23) | LN V<br>(n = 23) | Thrombocytopenia<br>(n = 25) | ACL<br>(n = 50) | Sjögren's<br>(n = 25) |
|-----------------------------|----------------------|---------------------|--------------------|-------------------|------------------|------------------------------|-----------------|-----------------------|
| Mucosal ulcers (%)          | 3                    | 8                   | 0                  | 0                 | 0                | 0                            | 4               | 4                     |
| Pleurisy (%)                | 3                    | 0                   | 6                  | 4                 | 4                | 4                            | 0               | 4                     |
| Pericarditis (%)            | 0                    | 0                   | 0                  | 0                 | 0                | 0                            | 0               | 0                     |
| Thrombocytopenia (%)        | 6                    | 0                   | 0                  | 4                 | 0                | 25                           | 4               | 12                    |
| Leukopenia (%)              | 9                    | 16                  | 0                  | 13                | 0                | 17                           | 6               | 8                     |
| Fever (%)                   | 0                    | 0                   | 0                  | 0                 | 0                | 0                            | 0               | 0                     |
| <b>LAI</b>                  |                      |                     |                    |                   |                  |                              |                 |                       |
| Median fatigue (1Q, 3Q)     | 0(0,0)               | 0(0,0)              | 0(0,0)             | 0(0,0)            | 0(0,0)           | 0(0,0)                       | 0(0,0)          | 0(0,0)                |
| Median rash (1Q, 3Q)        | 0(0,1)               | 0(0,1)              | 0(0,0)             | 0(0,0)            | 0(0,0)           | 0(0,0)                       | 1(0,1)          | 0(0,0)                |
| Median joints (1Q, 3Q)      | 0(0,0)               | 0(0,0)              | 0(0,0)             | 0(0,0)            | 0(0,0)           | 0(0,0)                       | 0(0,1)          | 0(0,0)                |
| Median serous (1Q, 3Q)      | 0(0,0)               | 0(0,0)              | 0(0,0)             | 0(0,0)            | 0(0,0)           | 0(0,0)                       | 0(0,0)          | 0(0,0)                |
| Median neurology (1Q, 3Q)   | 0(0,0)               | 0(0,0)              | 0(0,0)             | 0(0,0)            | 0(0,0)           | 0(0,0)                       | 0(0,0)          | 0(0,0)                |
| Median renal (1Q, 3Q)       | 0(0,1)               | 0(0,0)              | 0(0,1)             | 0(0,1)            | 1(0,2)           | 0(0,0)                       | 0(0,0)          | 0(0,0)                |
| Median pulmonary (1Q, 3Q)   | 0(0,0)               | 0(0,0)              | 0(0,0)             | 0(0,0)            | 0(0,0)           | 0(0,0)                       | 0(0,0)          | 0(0,0)                |
| Median haematology (1Q, 3Q) | 0(0,0)               | 0(0,0)              | 0(0,0)             | 0(0,0)            | 0(0,0)           | 0(0,0)                       | 0(0,0)          | 0(0,0)                |

SLEDAI = Systemic Lupus Erythematosus Disease Activity Index; LAI = Lupus Activity Index; HD = healthy donors; LN = lupus nephritis; ACL = acute cutaneous lupus; 1Q = first quartile; 3Q = third quartile.
